# Supplementary material for: Prevalence of Germline Mutations in Cancer Predisposition Genes in Patients with Pancreatic Cancer or Suspected Related Hereditary Syndromes: Historical Prospective Analysis
Source: MDPI journal article supplement (doi:10.3390/cancers15061852), 2023-03-20
Supplement: s1 [file s1]

**Table S1.** Genes included in the germ-line testing of the study.

| <b>Genes included in the germ-line testing</b> |
|------------------------------------------------|
| <i>APC</i>                                     |
| <i>ATM</i>                                     |
| <i>BRCA1</i>                                   |
| <i>BRCA 2</i>                                  |
| <i>BAP1</i>                                    |
| <i>CDK4</i>                                    |
| <i>CDKN2A</i>                                  |
| <i>CHEK2</i>                                   |
| <i>EPCAM</i>                                   |
| <i>MITF</i>                                    |
| <i>MLH1</i>                                    |
| <i>MSH2</i>                                    |
| <i>MSH6</i>                                    |
| <i>PALB2</i>                                   |
| <i>PMS2</i>                                    |
| <i>SMAD4</i>                                   |
| <i>STK11</i>                                   |
| <i>FANCM</i>                                   |
| <i>TP53</i>                                    |
